# Supplementary material
Source: PubMed Central journal article supplement (PMC4794042)
Supplement: hana020251.ww1_default.pdf [file hana020251.ww1_default.pdf]

**Appendix: Supplementary tables [posted as supplied by author]**

Reconciling race/ethnicity identification from multiple admission records

We used longitudinal data (2004-2010) on inpatient admissions for patients to reconcile race/ethnicity data across all admission records (i.e., not only the admissions during which the index knee and hip replacement procedures were performed). In case of dissimilar race/ethnicity reported in multiple admission records for a patient, we assign the race/ethnicity identified in the latest admission record. If race/ethnicity is unidentified (unknown or missing) in a admission record, then the race/ethnicity identified in the latest admission record is assigned. Following table indicates that reconciling longitudinally results in a decrease in missingness of race/ethnicity from 1.7% to 1.1% in MA and from 3.7% to 1.9% in the comparison states (NY, NJ and PA). We see that majority of the patients with missing race/ethnicity in their admission record were reassigned as white in both MA (81%) and comparison states (78%); consequently, the distribution of the overall patients among minority groups is virtually unchanged.

**Table A.** Original and reconciled race/ethnicity for patients with hip or knee replacement surgery, 2004-2010

|           | MA       |       |            |       | Comparison States |        |            |        |
|-----------|----------|-------|------------|-------|-------------------|--------|------------|--------|
|           | Original |       | Reconciled |       | Original          |        | Reconciled |        |
| Whites    | 31858    | 89.5% | 32013      | 90.0% | 156219            | 80.4%  | 159014     | 81.9%  |
| Blacks    | 1769     | 5.0%  | 1780       | 5.0%  | 18634             | 9.6%   | 18948      | 9.8%   |
| Hispanics | 784      | 2.2%  | 820        | 2.3%  | 6906              | 3.6%   | 6759       | 3.5%   |
| Other     | 584      | 1.6%  | 585        | 1.6%  | 5206              | 2.7%   | 5817       | 3.0%   |
| Unknown   | 592      | 1.7%  | 389        | 1.1%  | 7256              | 3.7%   | 3683       | 1.9%   |
| Total     | 35587    | 100%  | 35587      | 100%  | 194221            | 100.0% | 194221     | 100.0% |

**Table B.** Distribution of admission records with previously “unknown” race/ethnicity and reassigned race/ethnicity

|           | MA  |      | Comparison States |      |
|-----------|-----|------|-------------------|------|
|           | #   | %    | #                 | %    |
| Whites    | 164 | 81%  | 2,822             | 78%  |
| Blacks    | 17  | 8%   | 347               | 10%  |
| Hispanics | 15  | 7%   | 198               | 6%   |
| Other     | 7   | 3%   | 231               | 6%   |
| Total     | 203 | 100% | 3,598             | 100% |

Reconciling is infeasible for patients with only one hospitalization during the longitudinal study period. However, following table indicates that racial/ethnicity distribution (original) of such patients is similar to that of patients with multiple hospitalizations.

**Table C. Race/ethnicity distribution of patients with single/multiple hospitalizations**

|           | MA                     |       |                           |       | Comparison States      |       |                           |       |
|-----------|------------------------|-------|---------------------------|-------|------------------------|-------|---------------------------|-------|
|           | Single hospitalization |       | Multiple hospitalizations |       | Single hospitalization |       | Multiple hospitalizations |       |
| Whites    | 24,048                 | 89.8% | 7810                      | 88.7% | 121,776                | 80.1% | 34,443                    | 81.5% |
| Blacks    | 1,292                  | 4.8%  | 477                       | 5.4%  | 14,686                 | 9.7%  | 3,948                     | 9.3%  |
| Hispanics | 596                    | 2.2%  | 188                       | 2.1%  | 5,498                  | 3.6%  | 1,408                     | 3.3%  |
| Other     | 417                    | 1.6%  | 167                       | 1.9%  | 4,166                  | 2.7%  | 1,040                     | 2.5%  |
| Unknown   | 426                    | 1.6%  | 166                       | 1.9%  | 5,835                  | 3.8%  | 1,421                     | 3.4%  |
| Total     | 26779                  | 100%  | 8,808                     | 100%  | 151,961                | 100%  | 42,260                    | 100%  |

**Table D. Patient Characteristics by Procedure**  
(Patients from MA and comparison states combined)

| Characteristics              | Knee Replacement Procedure Counts |             | Hip Replacement Procedure Counts |             | Knee+Hip Replacement Procedure Counts |             |
|------------------------------|-----------------------------------|-------------|----------------------------------|-------------|---------------------------------------|-------------|
|                              | Pre-reform                        | Post-reform | Pre-reform                       | Post-reform | Pre-reform                            | Post-reform |
| All (40-64)                  | 63580                             | 84160       | 36289                            | 45818       | 99869                                 | 129978      |
| Sex                          |                                   |             |                                  |             |                                       |             |
| Women                        | 41434                             | 53133       | 17255                            | 21890       | 58689                                 | 75023       |
| Men                          | 22146                             | 31027       | 19034                            | 23928       | 41180                                 | 54955       |
| Age (years)                  |                                   |             |                                  |             |                                       |             |
| 40 to 54                     | 19629                             | 26122       | 16105                            | 18761       | 35734                                 | 44883       |
| 55 to 64                     | 43951                             | 58038       | 20184                            | 27057       | 64135                                 | 85095       |
| Area income, zip code median |                                   |             |                                  |             |                                       |             |
| Low                          | 13312                             | 17813       | 6415                             | 8421        | 19727                                 | 26234       |
| Medium                       | 17096                             | 22646       | 8875                             | 11046       | 25971                                 | 33692       |
| High                         | 32487                             | 42539       | 20612                            | 25760       | 53099                                 | 68299       |
| Race/ethnicity               |                                   |             |                                  |             |                                       |             |
| Whites                       | 52550                             | 69796       | 30253                            | 38818       | 82803                                 | 108614      |
| Non-whites                   | 11030                             | 14364       | 6036                             | 7000        | 17066                                 | 21364       |
| Blacks                       | 5863                              | 8001        | 3057                             | 4194        | 8920                                  | 12195       |
| Hispanics                    | 2260                              | 3083        | 1015                             | 1244        | 3275                                  | 4327        |

**Table E-1.** Sensitivity Analysis 1: Treat 18-64 age group instead of 40-64 as study population  
Utilization of Total Knee and Hip Replacements

| Population                                   | Procedure Rate (/10,000) in MA |                         |             |                         | Overall change (%) in MA, Unadj. <sup>a</sup> | Change in MA associated with health reform <sup>b</sup> |                      |                         |
|----------------------------------------------|--------------------------------|-------------------------|-------------|-------------------------|-----------------------------------------------|---------------------------------------------------------|----------------------|-------------------------|
|                                              | Pre-Reform                     | 95% Confidence Interval | Post-Reform | 95% Confidence Interval |                                               | Mean, %                                                 | P-value <sup>c</sup> | 95% Confidence Interval |
| <b>Knee &amp; Hip Replacement Procedures</b> |                                |                         |             |                         |                                               |                                                         |                      |                         |
| All                                          | 17.8                           | [17.5, 18.0]            | 21.5        | [21.2, 21.8]            | 20.8%                                         | 3.6%                                                    | 0.01                 | [0.8%, 6.4%]            |
| Race/ethnicity                               |                                |                         |             |                         |                                               |                                                         |                      |                         |
| Whites, non-Hispanic                         | 18.6                           | [18.3, 18.8]            | 22.7        | [22.4, 23.0]            | 22.0%                                         | 1.7%                                                    | <0.001               | [0.5%, 2.9%]            |
| Blacks, non-Hispanic                         | 16.5                           | [15.3, 17.6]            | 22.0        | [20.8, 23.3]            | 33.3%                                         | 11.7%                                                   | <0.001               | [7.7%, 15.7%]           |
| Hispanics                                    | 7.4                            | [6.6, 8.3]              | 10.5        | [9.6, 11.3]             | 41.9%                                         | 38.9%                                                   | <0.001               | [34.8%, 43.1%]          |
| Zip Code Median Income                       |                                |                         |             |                         |                                               |                                                         |                      |                         |
| Low Income                                   | 13.4                           | [13.0, 13.9]            | 17.4        | [16.9, 17.9]            | 29.9%                                         | 7.7%                                                    | <0.001               | [4.1%, 11.4%]           |
| Medium Income                                | 15.5                           | [15.0, 16.0]            | 18.6        | [18.1, 19.1]            | 20.0%                                         | 3.1%                                                    | 0.12                 | [-0.8%, 7.3%]           |
| High Income                                  | 17.5                           | [17.2, 17.9]            | 20.9        | [20.5, 21.3]            | 19.4%                                         | 4.3%                                                    | <0.001               | [2.9%, 5.8%]            |

Notes:

- a) Overall change is the % change between pre-reform and post-reform procedure rates.
- b) Change associated with MA health reform is obtained from a difference-in-differences Poisson regression model to adjust for difference secular changes (based on comparison with NJ, NY and PA) with fixed effects for quarter and state. Standard errors are corrected for clustering within states.
- c) P-value associated with the null hypothesis of no reform-associated change in procedure use.

**Table E-2. Sensitivity Analysis 2: Adjusting for state-level unemployment (quarterly)  
Utilization of Total Knee and Hip Replacements**

| Population                                   | Procedure Rate (/10,000) in MA |              |             |              | Overall change (%) in MA, Unadj. <sup>a</sup> | Change in MA associated with health reform <sup>b</sup> |                      |                         |
|----------------------------------------------|--------------------------------|--------------|-------------|--------------|-----------------------------------------------|---------------------------------------------------------|----------------------|-------------------------|
|                                              | Pre-Reform                     | P-value      | Post-Reform | P-value      |                                               | Mean, %                                                 | P-value <sup>c</sup> | 95% Confidence Interval |
| <b>Knee &amp; Hip Replacement Procedures</b> |                                |              |             |              |                                               |                                                         |                      |                         |
| All                                          | 29.0                           | [28.5, 29.4] | 35.5        | [35.0, 36.0] | 22.4%                                         | 4.6%                                                    | <0.001               | [2.3%, 7.0%]            |
| Race/ethnicity                               |                                |              |             |              |                                               |                                                         |                      |                         |
| Whites, non-Hispanic                         | 30.1                           | [29.6, 30.6] | 37.3        | [36.7, 37.8] | 23.9%                                         | 2.8%                                                    | <0.001               | [1.2%, 4.4%]            |
| Blacks, non-Hispanic                         | 28.1                           | [26.0, 30.2] | 37.9        | [35.7, 40.1] | 34.9%                                         | 11.4%                                                   | <0.001               | [8.0%, 14.8%]           |
| Hispanics                                    | 12.9                           | [11.4, 14.5] | 17.9        | [16.4, 19.4] | 38.8%                                         | 37.8%                                                   | <0.001               | [34.4%, 41.2%]          |
| Zip Code Median Income                       |                                |              |             |              |                                               |                                                         |                      |                         |
| Low Income                                   | 25.5                           | [24.6, 26.4] | 33.3        | [32.3, 34.2] | 30.6%                                         | 7.6%                                                    | <0.001               | [4.8%, 10.5%]           |
| Medium Income                                | 28.9                           | [28.0, 29.8] | 35.1        | [34.1, 36.0] | 21.5%                                         | 3.6%                                                    | 0.06                 | [-0.2%, 7.5%]           |
| High Income                                  | 30.4                           | [29.8, 31.1] | 36.5        | [35.9, 37.2] | 20.1%                                         | 4.7%                                                    | <0.001               | [3.1%, 6.2%]            |

Notes:

- a) Overall change is the % change between pre-reform and post-reform procedure rates.
- b) Change associated with MA health reform is obtained from a difference-in-differences Poisson regression model to adjust for difference secular changes (based on comparison with NJ, NY and PA) with fixed effects for quarter and state. Standard errors are corrected for clustering within states.
- c) P-value associated with the null hypothesis of no reform-associated change in procedure use.

**Table F.** Safety-net status and share of admissions with Medicaid, self-pay and Free-care as primary payer in Massachusetts, by period  
 [All inpatient admissions for adults aged 18-64]

| Hospital Name                              | % admissions paid by Medicaid, self-pay and Free-care |                                     |
|--------------------------------------------|-------------------------------------------------------|-------------------------------------|
|                                            | Pre-Reform:<br>2004Q1 to<br>2006Q2                    | Post-Reform:<br>2008Q1 to<br>2010Q2 |
| <b>Safetynet Hospitals</b>                 |                                                       |                                     |
| Cambridge Health Alliance                  | 67.9%                                                 | 47.0%                               |
| Boston Medical Center                      | 58.6%                                                 | 50.9%                               |
| Mercy Medical Center - Springfield Campus  | 44.6%                                                 | 40.0%                               |
| Clinton Hospital                           | 44.1%                                                 | 19.8%                               |
| Holyoke Medical Center                     | 42.3%                                                 | 42.2%                               |
| Signature Healthcare Brockton Hospital     | 41.2%                                                 | 37.6%                               |
| Caritas Good Samaritan Medical Center      | 40.6%                                                 | 33.4%                               |
| Athol Memorial Hospital                    | 39.1%                                                 | 37.9%                               |
| Lawrence General Hospital                  | 37.2%                                                 | 33.1%                               |
| North Shore Medical Center, Inc.           | 37.2%                                                 | 30.4%                               |
| North Adams Regional Hospital              | 36.9%                                                 | 40.3%                               |
| Caritas Carney Hospital                    | 36.8%                                                 | 36.1%                               |
| Nantucket Cottage Hospital                 | 36.6%                                                 | 49.3%                               |
| Wing Memorial Hospital and Medical Centers | 35.4%                                                 | 24.2%                               |
| Berkshire Medical Center                   | 34.7%                                                 | 34.2%                               |
| <b>Non-safetynet Hospitals</b>             |                                                       |                                     |
| Noble Hospital                             | 34.6%                                                 | 29.9%                               |
| Southcoast Hospitals Group - St. Luke's    | 33.7%                                                 | 36.8%                               |
| Heywood Hospital                           | 33.7%                                                 | 29.6%                               |
| Martha's Vineyard Hospital                 | 32.0%                                                 | 30.3%                               |
| Merrimack Valley Hospital                  | 31.8%                                                 | 31.0%                               |
| Morton Hospital and Medical Center         | 31.4%                                                 | 35.8%                               |
| Quincy Medical Center                      | 30.7%                                                 | 26.4%                               |
| Health Alliance Hospitals, Inc.            | 30.6%                                                 | 31.3%                               |
| Baystate Franklin Medical Center           | 30.1%                                                 | 31.8%                               |
| Baystate Medical Center                    | 30.0%                                                 | 34.2%                               |
| UMass Memorial Medical Center              | 29.4%                                                 | 24.7%                               |
| Northeast Health System - Beverly Campus   | 28.2%                                                 | 30.3%                               |
| Northeast Health System - Addison Gilbert  | 27.7%                                                 | 27.0%                               |
| Cape Cod Hospital                          | 27.7%                                                 | 25.8%                               |

**Table F** (continued)

| Hospital Name                                        | % admissions paid by Medicaid, self-pay and Free-care |                                     |
|------------------------------------------------------|-------------------------------------------------------|-------------------------------------|
|                                                      | Pre-Reform:<br>2004Q1 to<br>2006Q2                    | Post-Reform:<br>2008Q1 to<br>2010Q2 |
| UMass Memorial Medical Center - Marlborough Hospital | 27.7%                                                 | 22.0%                               |
| Caritas Holy Family Hospital and Medical Center      | 27.5%                                                 | 32.6%                               |
| Caritas St. Anne's Hospital                          | 27.2%                                                 | 35.4%                               |
| Tufts-New England Medical Center                     | 26.9%                                                 | 27.2%                               |
| MetroWest Medical Center                             | 26.9%                                                 | 26.8%                               |
| Baystate Mary Lane Hospital                          | 26.2%                                                 | 30.2%                               |
| Fairview Hospital                                    | 26.2%                                                 | 29.8%                               |
| Lowell General Hospital                              | 26.0%                                                 | 30.7%                               |
| Cooley Dickinson Hospital                            | 25.9%                                                 | 22.8%                               |
| Saints Memorial Medical Center                       | 25.2%                                                 | 25.5%                               |
| Saint Vincent Hospital                               | 24.7%                                                 | 24.7%                               |
| Children's Hospital Boston                           | 23.4%                                                 | 16.8%                               |
| Hallmark Health System - Melrose-Wakefield Hospital  | 22.8%                                                 | 25.3%                               |
| Falmouth Hospital                                    | 22.5%                                                 | 22.5%                               |
| Anna Jaques Hospital                                 | 22.2%                                                 | 20.6%                               |
| Jordan Hospital                                      | 21.9%                                                 | 21.9%                               |
| Sturdy Memorial Hospital                             | 21.5%                                                 | 20.4%                               |
| Massachusetts General Hospital                       | 20.4%                                                 | 16.9%                               |
| Caritas St. Elizabeth's Medical Center               | 20.1%                                                 | 19.2%                               |
| Harrington Memorial Hospital                         | 20.0%                                                 | 35.4%                               |
| Faulkner Hospital                                    | 17.9%                                                 | 16.9%                               |
| Milton Hospital                                      | 17.9%                                                 | 15.7%                               |
| Mount Auburn Hospital                                | 17.7%                                                 | 14.9%                               |
| Nashoba Valley Medical Center                        | 17.1%                                                 | 15.2%                               |
| Dana-Farber Cancer Institute                         | 17.1%                                                 | 10.1%                               |
| Beth Israel Deaconess Medical Center                 | 16.9%                                                 | 14.0%                               |
| Caritas Norwood Hospital                             | 15.9%                                                 | 15.5%                               |
| Brigham and Women's Hospital                         | 15.6%                                                 | 13.6%                               |
| Milford Regional Medical Center                      | 13.5%                                                 | 17.0%                               |
| Newton-Wellesley Hospital                            | 12.7%                                                 | 10.3%                               |
| Winchester Hospital                                  | 10.6%                                                 | 13.6%                               |
| South Shore Hospital                                 | 9.6%                                                  | 12.1%                               |
| Lahey Clinic -- Burlington Campus                    | 8.8%                                                  | 7.7%                                |
| New England Baptist Hospital                         | 3.3%                                                  | 2.6%                                |
